# Supplementary material
Source: MDPI journal article supplement (https://www.mdpi.com/1424-8247/17/5/618)
Supplement: s1 [file s1]

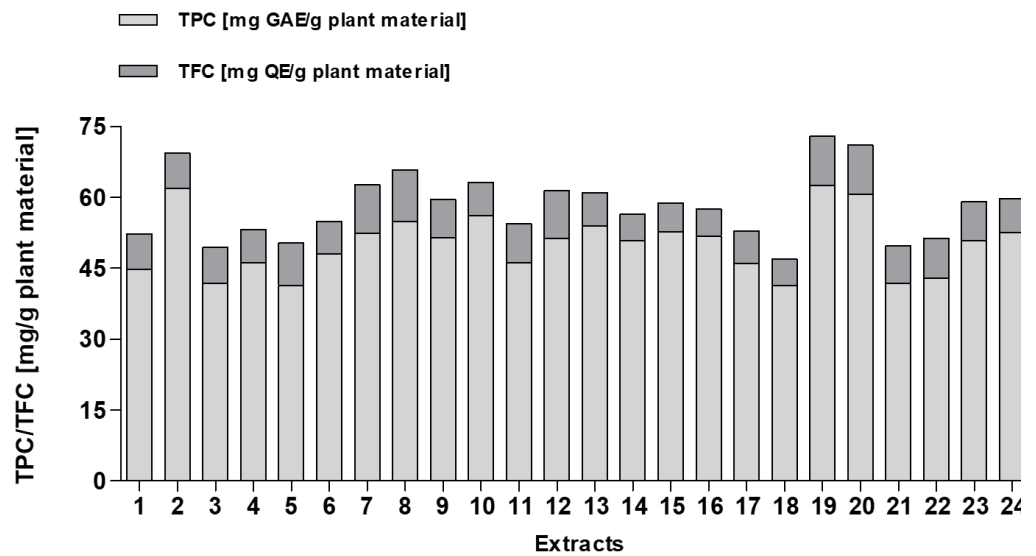

**Figure S1.** Total polyphenol content (TPC) and total flavonoid content (TFC) in extracts; numbers 1-24 indicate the extracts prepared from different varieties of *S. nigra*: 1-'Sampo' leaves I, 2-'Sampo' leaves II; 3-'Obelisk' leaves I, 4-'Obelisk' leaves II, 5-'Dwubarwny' leaves I, 6-'Dwubarwny' leaves II, 7-'Haschberg' leaves I, 8-'Haschberg' leaves II, 9-'Haschberg 1' leaves I, 10-'Haschberg 1' leaves II, 11-'Koralowy' leaves I, 12-'Koralowy' leaves II, 13-'Sambo' leaves I, 14-'Sambo' leaves II, 15-'Black Beauty' leaves I, 16-'Black Beauty' leaves II, 17-'Black Tower' leaves I, 18-'Black Tower' leaves II, 19-'Golden hybrid' leaves I, 20-'Golden hybrid' leaves II, 21-'Samyl' leaves I, 22-'Samyl' leaves II, 23-'Samyl 1' leaves I, 24-'Samyl 1' leaves II.

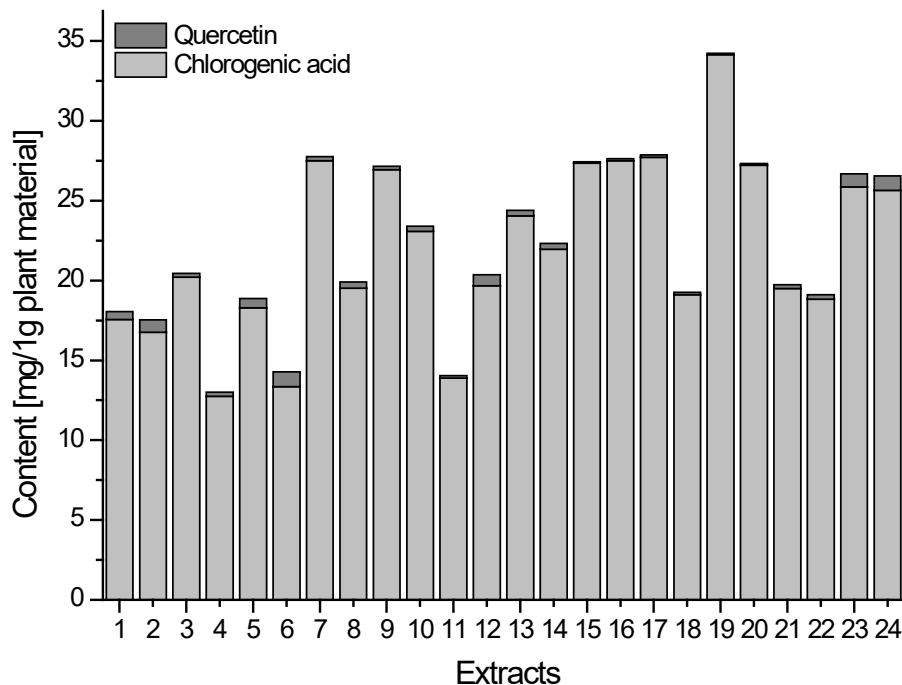

**Figure S2.** Content of chlorogenic acid and quercetin in extracts; numbers 1-24 indicate the extracts prepared from different varieties of *S. nigra*: 1-'Sampo' leaves I, 2-'Sampo' leaves II; 3-'Obelisk' leaves I, 4-'Obelisk' leaves II, 5-'Dwubarwny' leaves I, 6-'Dwubarwny' leaves II, 7-'Haschberg' leaves I, 8-'Haschberg' leaves II, 9-'Haschberg 1' leaves I, 10-'Haschberg 1' leaves II, 11-'Koralowy' leaves I, 12-'Koralowy' leaves II, 13-'Sambo' leaves I, 14-'Sambo' leaves II, 15-'Black Beauty' leaves I, 16-'Black Beauty' leaves II, 17-'Black Tower' leaves I, 18-'Black Tower' leaves II, 19-'Golden hybrid' leaves I, 20-'Golden hybrid' leaves II, 21-'Samyl' leaves I, 22-'Samyl' leaves II, 23-'Samyl 1' leaves I, 24-'Samyl 1' leaves II.

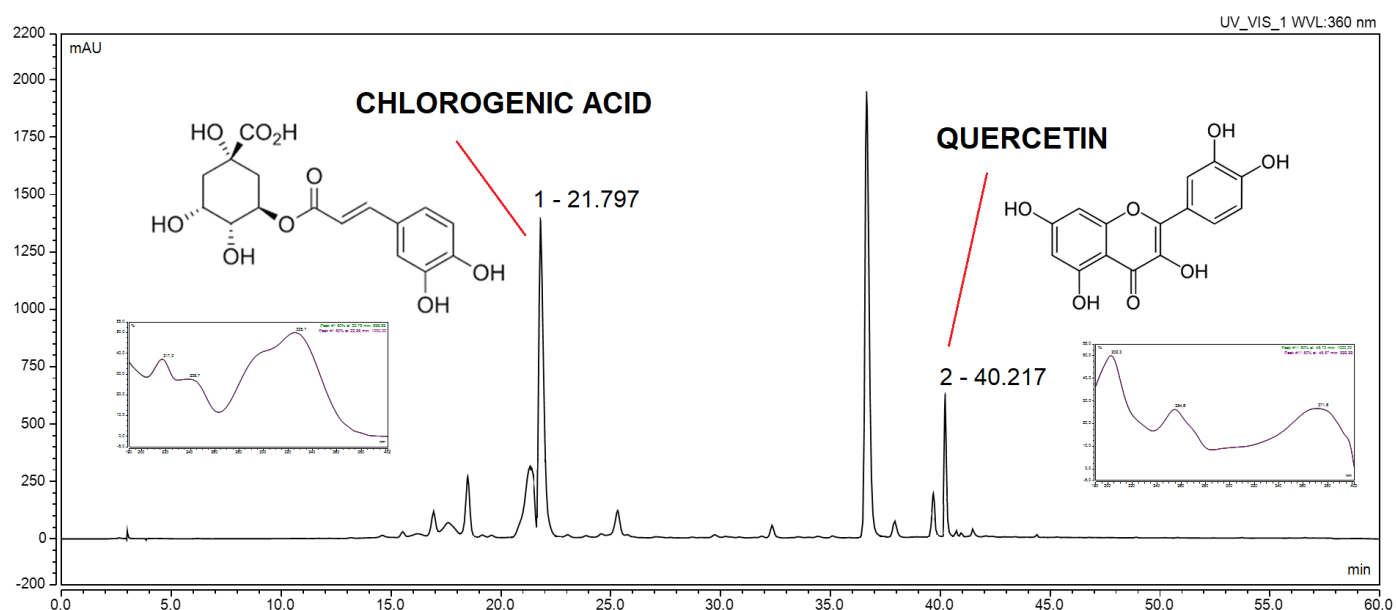

Figure S3. Chromatogram of Sampo leaves I extract in the initial concentration.

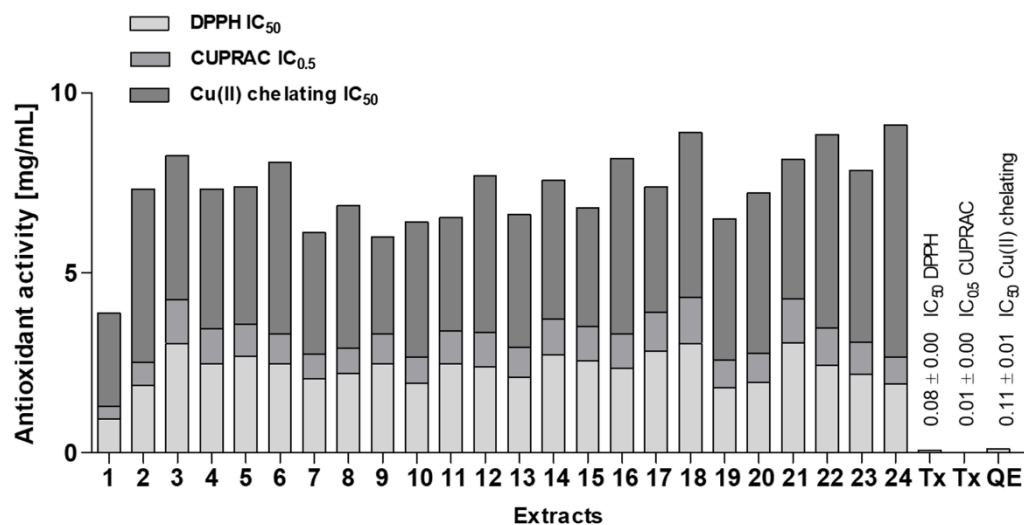

Figure S4. Antioxidant activity measured using DPPH method, CUPRAC method, Cu(II) chelating method; numbers 1-24 indicate the extracts prepared from different varieties of *S. nigra*: 1-'Sampo' leaves I, 2-'Sampo' leaves II; 3-'Obelisk' leaves I, 4-'Obelisk' leaves II, 5-'Dwubarwny' leaves I, 6-'Dwubarwny' leaves II, 7-'Haschberg' leaves I, 8-'Haschberg' leaves II, 9-'Haschberg 1' leaves I, 10-'Haschberg 1' leaves II, 11-'Koralowy' leaves I, 12-'Koralowy' leaves II, 13-'Sambo' leaves I, 14-'Sambo' leaves II, 15-'Black Beauty' leaves I, 16-'Black Beauty' leaves II, 17-'Black Tower' leaves I, 18-'Black Tower' leaves II, 19-'Golden hybrid' leaves I, 20-'Golden hybrid' leaves II, 21-'Samyl' leaves I, 22-'Samyl' leaves II, 23-'Samyl 1' leaves I, 24-'Samyl 1' leaves II; Tx-Trolox, QE-quercetin.

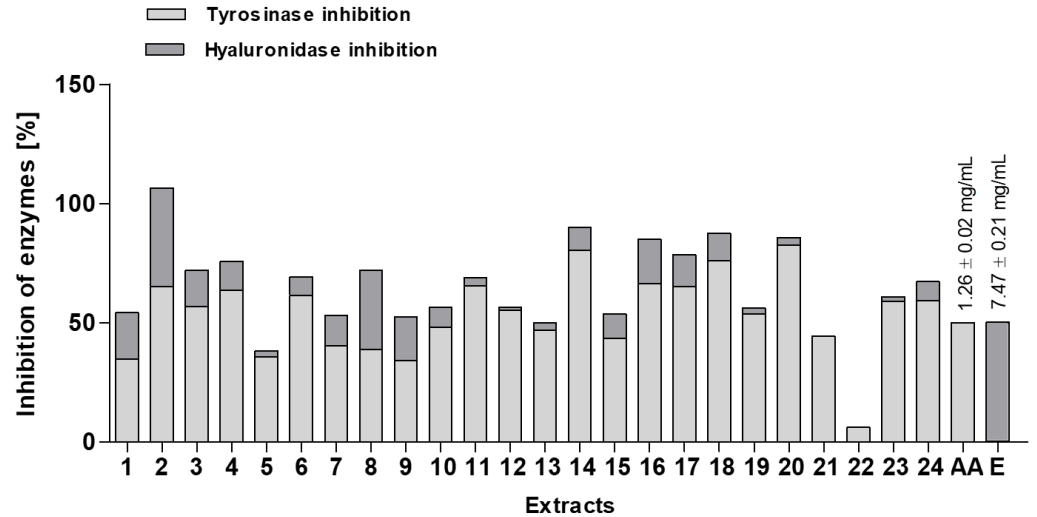

**Figure S5.** Inhibition of enzymes: tyrosinase (100 mg/mL) and hyaluronidase (50 mg/mL); numbers 1-24 indicate the extracts prepared from different varieties of *S. nigra*: 1-‘Sampo’ leaves I, 2-‘Sampo’ leaves II; 3-‘Obelisk’ leaves I, 4-‘Obelisk’ leaves II, 5-‘Dwubarwny’ leaves I, 6-‘Dwubarwny’ leaves II, 7-‘Haschberg’ leaves I, 8-‘Haschberg’ leaves II, 9-‘Haschberg 1’ leaves I, 10-‘Haschberg 1’ leaves II, 11-‘Koralowy’ leaves I, 12-‘Koralowy’ leaves II, 13-‘Sambo’ leaves I, 14-‘Sambo’ leaves II, 15-‘Black Beauty’ leaves I, 16-‘Black Beauty’ leaves II, 17-‘Black Tower’ leaves I, 18-‘Black Tower’ leaves II, 19-‘Golden hybrid’ leaves I, 20-‘Golden hybrid’ leaves II, 21-‘Samyl’ leaves I, 22-‘Samyl’ leaves II, 23-‘Samyl 1’ leaves I, 24-‘Samyl 1’ leaves II; AA-Azelaic acid, E-β-escin.

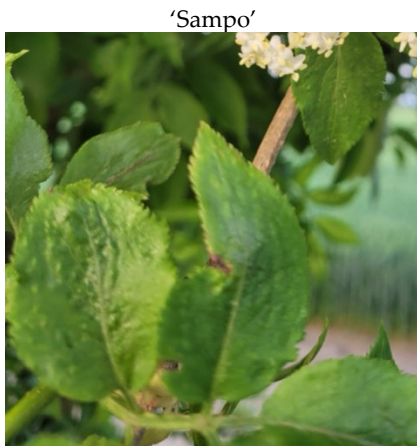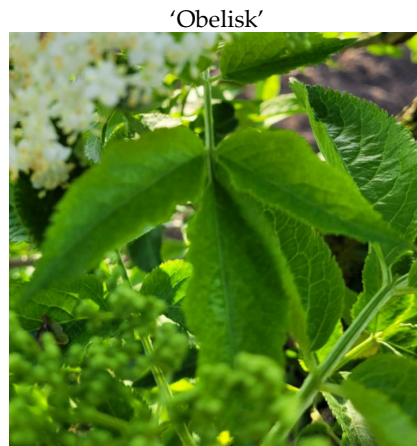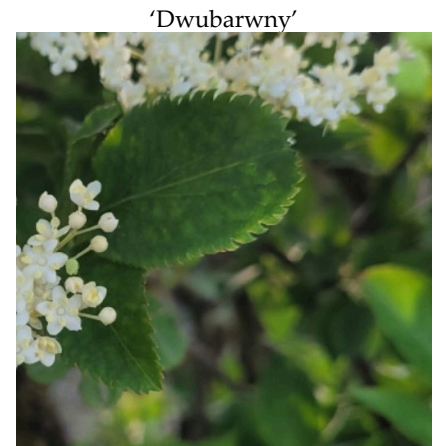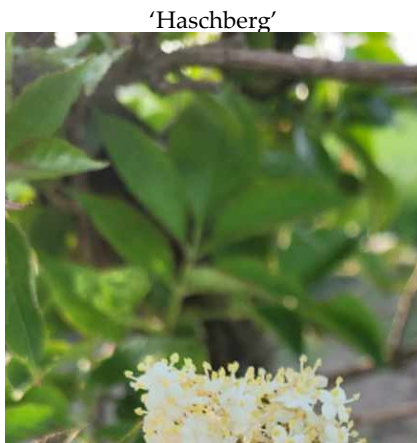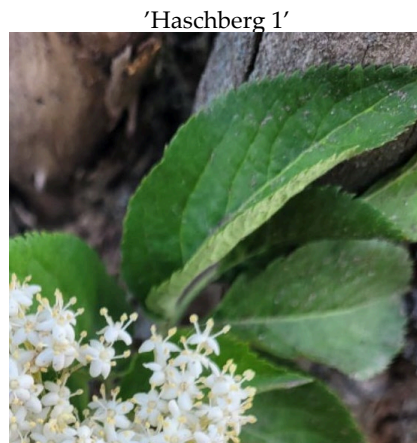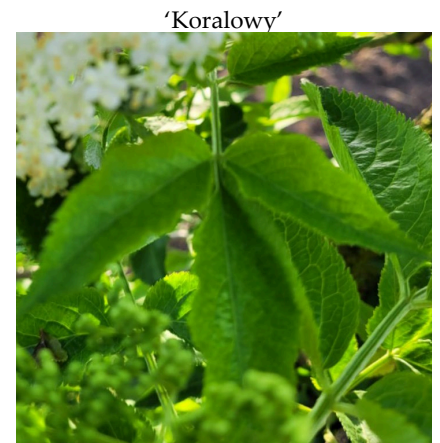

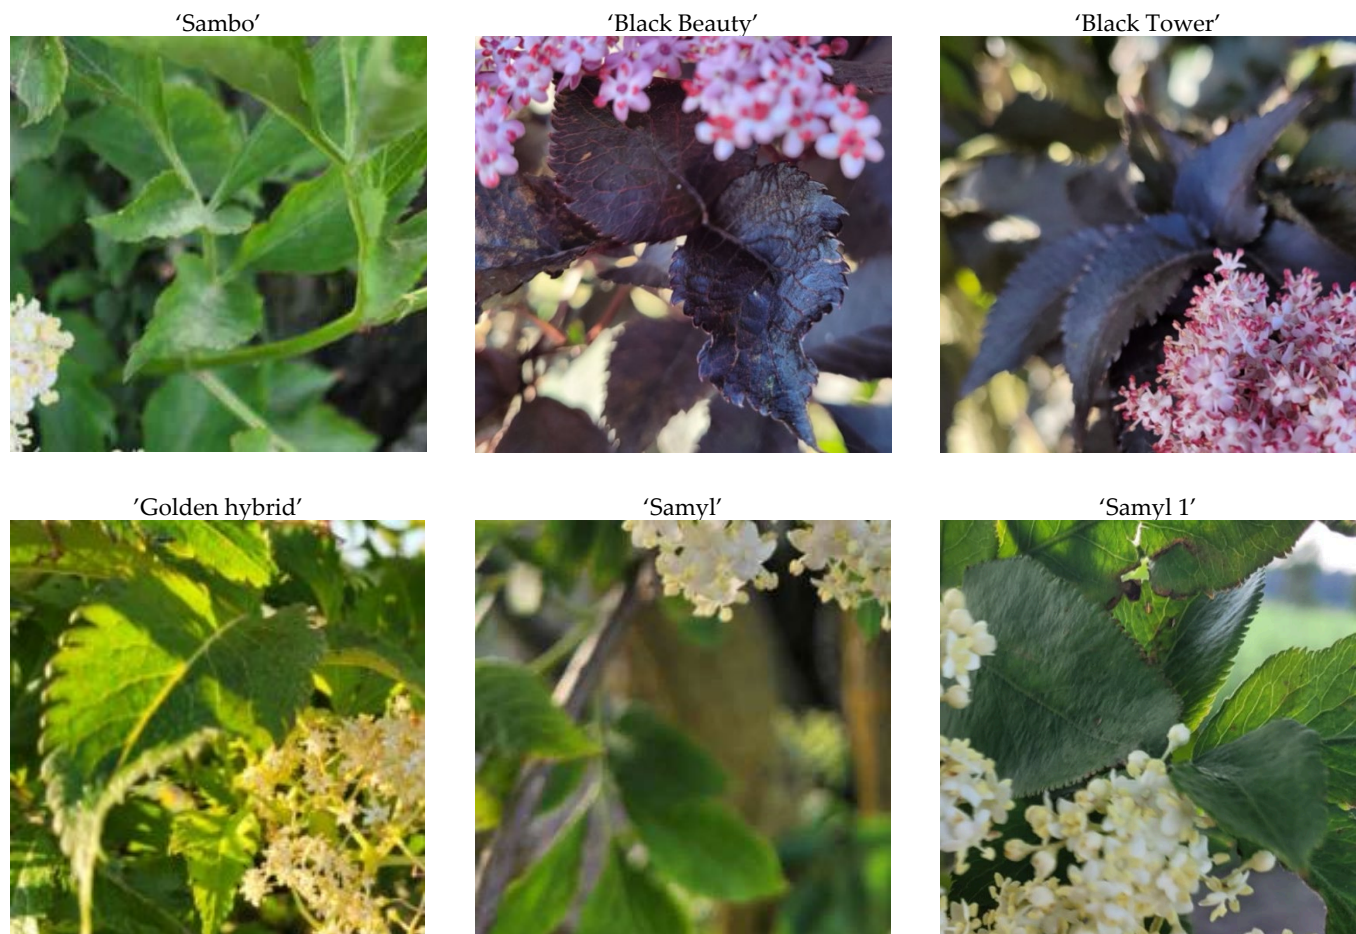

**Figure S6.** Photos of leaves of individual varieties

**Table S1.** Characteristic features of elderberry varieties leaves

| Plant part      |                         | Yong Leaf               | Leaf                   |                               |                | Leaflet               |                      |                          |                     |
|-----------------|-------------------------|-------------------------|------------------------|-------------------------------|----------------|-----------------------|----------------------|--------------------------|---------------------|
| Variety         | Characteristic features | Anthocyanin coloration* | Anthocyanin coloration | Relative position of leaflets | Lenght         | Width                 | Undulation of margin | Glossiness on upper side | Length of petiolule |
| 'Sampo'         |                         | weak                    | absent                 | touching                      | short          | narrow                | very weak to weak    | weak                     | short to medium     |
| 'Obelisk'       |                         | absent or very weak     | absent                 | free                          | medium to long | medium to broad       | weak                 | weak                     | short to medium     |
| 'Dwubarwny'     |                         | absent or very weak     | absent                 | free                          | short          | narrow                | weak                 | weak                     | medium              |
| 'Haschberg'     |                         | absent or very weak     | absent                 | overlapping                   | long           | broad                 | weak to medium       | weak                     | Medium to long      |
| 'Haschberg 1'   |                         | absent or very weak     | absent                 | overlapping                   | medium to long | broad                 | medium               | medium                   | medium              |
| 'Koralowy'      |                         | absent or very weak     | absent                 | touching                      | short          | narrow to medium      | medium               | weak                     | very short          |
| 'Sambo'         |                         | weak                    | absent                 | touching                      | medium         | medium                | weak                 | weak to medium           | short to medium     |
| 'Black beauty'  |                         | very strong             | strong                 | free                          | long           | narrow                | medium               | strong                   | very short          |
| 'Black tower'   |                         | medium                  | strong                 | free                          | short          | very narrow to narrow | weak to medium       | medium                   | very short          |
| 'Golden hybrid' |                         | medium                  | weak                   | touching                      | medium         | medium to broad       | medium               | medium                   | medium              |

|                  |                        |        |          |       |                     |      |                   |                    |
|------------------|------------------------|--------|----------|-------|---------------------|------|-------------------|--------------------|
| <b>‘Samyl’</b>   | absent<br>or very weak | absent | touching | short | narrow to<br>medium | weak | weak<br>to medium | short to<br>medium |
| <b>‘Samyl 1’</b> | absent<br>or very weak | absent | touching | short | narrow              | weak | weak              | short to<br>medium |

\*Anthocyanin coloration during rapid growth
